# Supplementary material
Source: PubMed Central journal article supplement (PMC8006086)
Supplement: NIHMS1677873-supplement-1.pdf [file NIHMS1677873-supplement-1.pdf]

# **Strain Background Drives LRRK2 Kinase Activity in the Rat Brain**

**Kaela Kelly<sup>1</sup>, Allison Chang<sup>1</sup>, Lyndsay Hastings<sup>1</sup>, Hisham Abdelmotilib<sup>2</sup>,  
Andrew B. West<sup>1\*</sup>**

<sup>1</sup>Duke Center for Neurodegeneration Research, Department of Pharmacology and Cancer Biology, Duke University, Durham, North Carolina, USA

<sup>2</sup>Department of Neurology, University of Iowa Hospitals and Clinics, Iowa City, Iowa, USA

\*C.A. Information: [andrew.west@duke.edu](mailto:andrew.west@duke.edu), 3 Genome Court, Durham, North Carolina, 27710 USA

**Supplemental Tables and Figures**

**Supplemental Table 1. LRRK2 kinase selectivity profiles for small molecules PF-475 and PFE-360**

**Kinases >50% Inhibited**

| <b>1 <math>\mu</math>M PF-475</b>                                      | <b>1 <math>\mu</math>M PFE-360</b> |
|------------------------------------------------------------------------|------------------------------------|
| LRRK2<br>LOK<br>MST1<br>MST2<br>MST3<br>MST4<br>PIP4K2C<br>RSK1<br>SLK | LRRK2<br>MAP3K5                    |
| Henderson, 2015 (PMID: 25353650)                                       | Thirstrup, 2017 (PMID: 28860483)   |

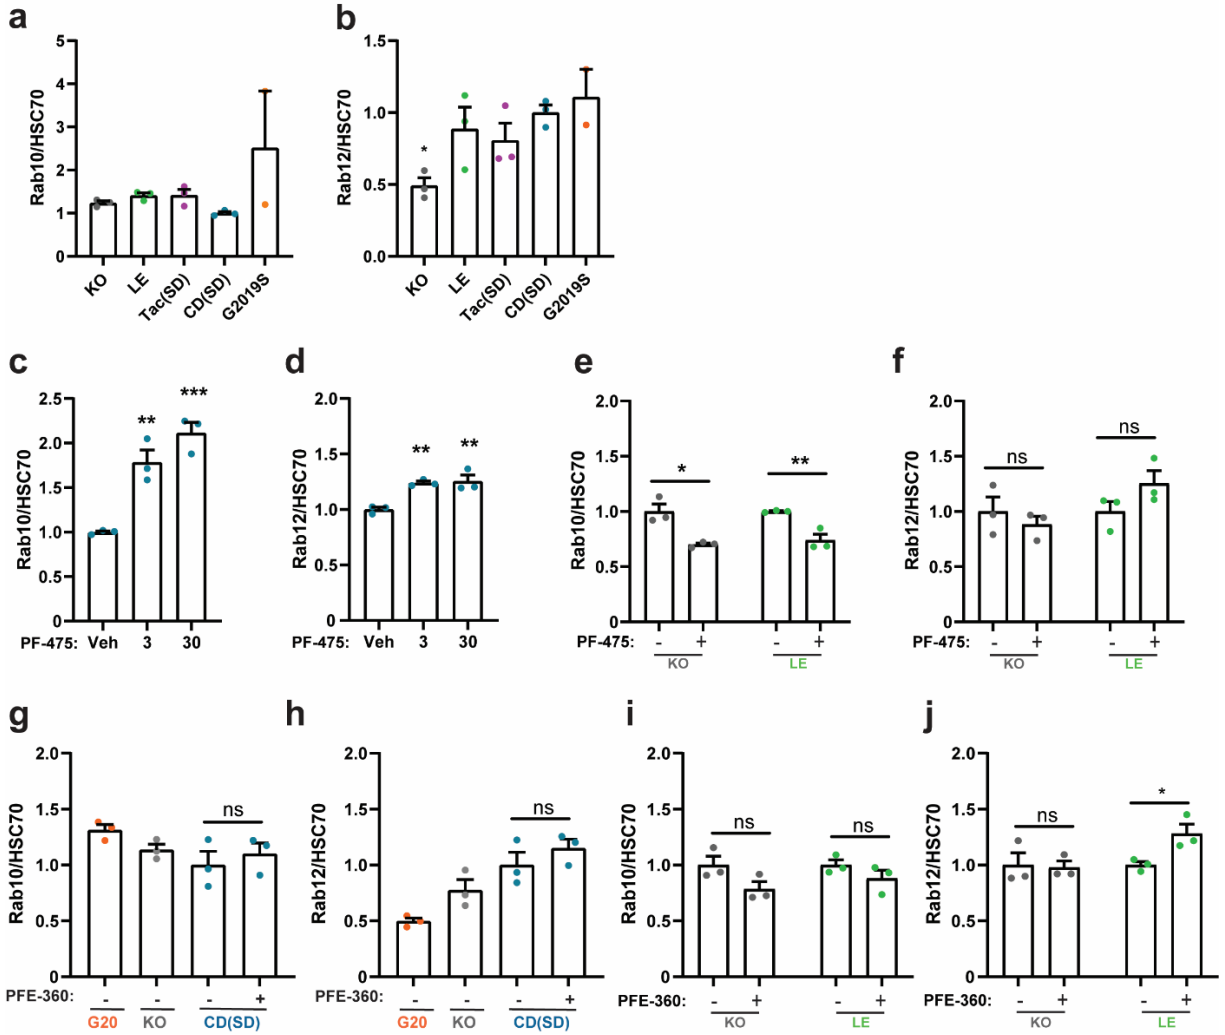

**Supplemental Figure 1. Total Rab10 and Rab12 protein levels normalized to HSC70 in forebrain tissue from different rat strains and following oral dosing of small molecules PF-475 or PFE-360.** Quantification of **a.** total Rab10 and **b.** total Rab12 protein levels normalized to Hsc70 in forebrain lysates of non-treated LRRK2 knockout (KO, Long-Evans background), NTG Long-Evans (LE), NTG Tac(Sprague Dawley, (Tac(SD)), NTG Charles Rivers(Sprague Dawley, (CD(SD))), and transgenic G2019S-BAC rats (G20, on Tac(SD) background) rats. All data are graphed as average measures from triplicate western blots for biological replicates (N=3 rats per group, except for G2019S N=2)). Bar graphs show group means  $\pm$  SEM. Quantification of **c.** total Rab10 and **d.** total Rab12 protein levels normalized to Hsc70 in Charles Rivers(Sprague Dawley, (CD(SD)) rats treated with vehicle, 3 mg $\cdot$ kg $^{-1}$ , or 30 mg $\cdot$ kg $^{-1}$  of PF-475, corresponding to the in-text Figure 2. Significance between groups was determined by one-way ANOVA with Dunnett's multiple comparison test with respect to the indicated group and the CD(SD) group. Quantification of **e.** total Rab10 and **f.** total Rab12 protein levels normalized to Hsc70 in Lrrk2 KO (KO) and Long-Evans (LE) rats treated with vehicle or PF-475 (30 mg $\cdot$ kg $^{-1}$ ), corresponding to in-text Figure 3. Quantification of **g.** total Rab10 and **h.** total Rab12 protein levels normalized to Hsc70 in transgenic G2019S-LRRK2, LRRK2 KO (KO), and Charles Rivers(Sprague Dawley, (CD(SD)) rats treated with vehicle or PFE-360 (20 mg $\cdot$ kg $^{-1}$ ),

corresponding to in-text Figure 4. Significance between groups was determined by one-way ANOVA with Dunnet's multiple comparison test with respect to the indicated group and the vehicle treated group mean. Quantification of **i.** total Rab10 and **j.** total Rab12 protein levels normalized to Hsc70 in transgenic LRRK2 KO (KO), and NTG Long-Evans (LE) rats treated with vehicle or PFE-360 (20 mg·kg<sup>-1</sup>), corresponding to in-text Figure 5. Significance between groups were determined by two-tailed unpaired *t*-test. Bar graphs show group means ± SEM. \**p* < 0.05, \*\**p* < 0.01., \*\*\**p* < 0.001, ns is not significant.

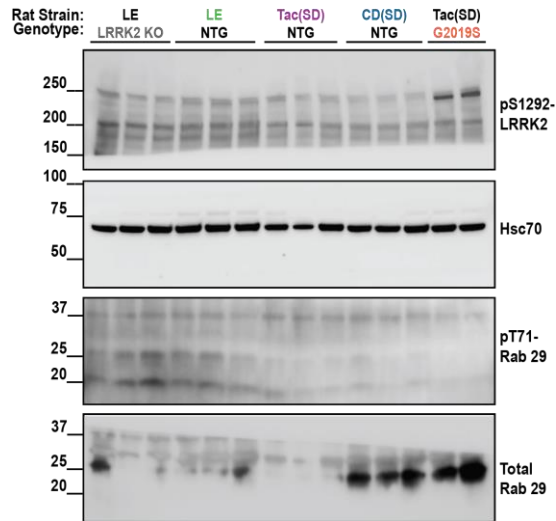

**Supplemental Figure 2. Unreliable detection of pS1292-LRRK2, pT71-Rab29, and total Rab29 protein in lysates from rat brains.** LRRK2 autophosphorylation site pS1292 is most abundantly detected in G2019S-LRRK2 rats that overexpress LRRK2 protein by ~10-fold, but in all other strains, the signal nearby the 250kDa marker is not different between LRRK2 KOs and other strains. Thus, detection of pS1292-LRRK2 (MJFR-19-7-8, Abcam) in non-transgenic Long-Evans (LE) and Sprague Dawley rats (Taconic (Tac(SD)) and Charles Rivers (CD(SD))) appear similarly to LRRK2 knockout rats (Long-Evans background) and demonstrate a non-specific signal.

Detection of pT71-Rab29 (MJF-R24-17-1, Abcam) and total Rab29 (MJF-R30-124, Abcam) protein was unsuccessful in rat brain tissue, with non-specific background after long exposures evolving at the wrong molecular weights for Rab29 targets. Exact epitopes for the antibodies were not available to compare between rat and mouse Rab29 proteins, as we suspect amino-acid differences between human, mice and rats, that may affect antibody binding and specificity. Alternatively, Rab29 may be lowly expressed in the rat brain compared to other species.

**Figure 1a Full Immunoblots**

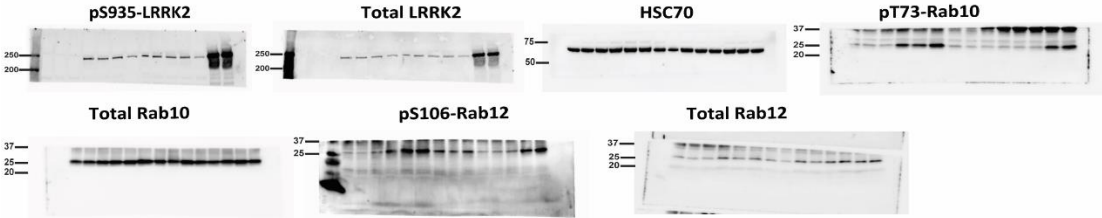

**Figure 2a Full Immunoblots**

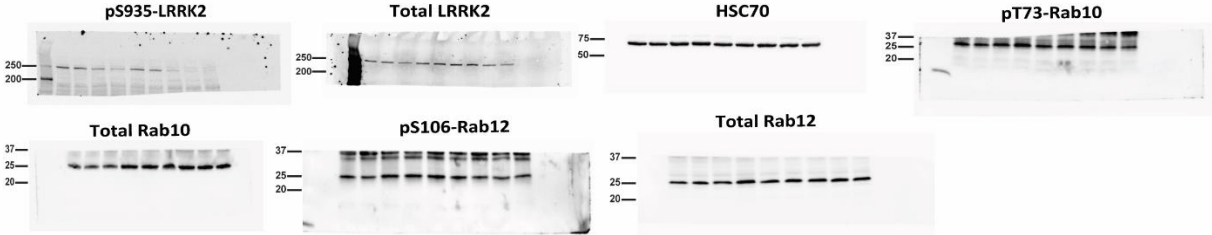

**Figure 3a Full Immunoblots**

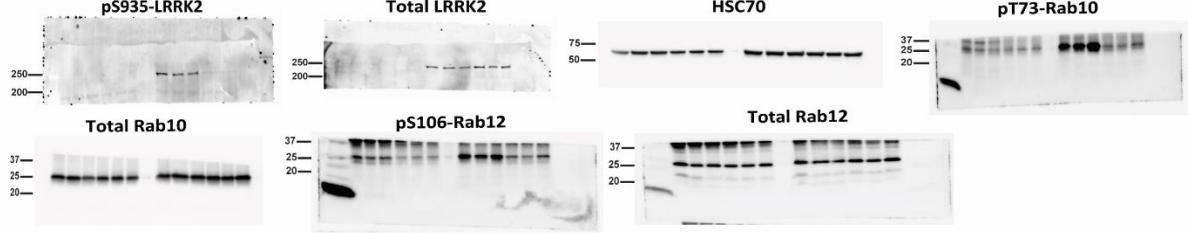

**Figure 4a Full Immunoblots**

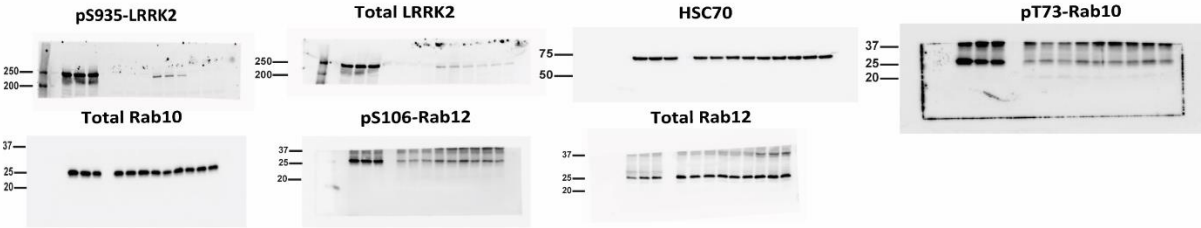

**Figure 5a Full Immunoblots**

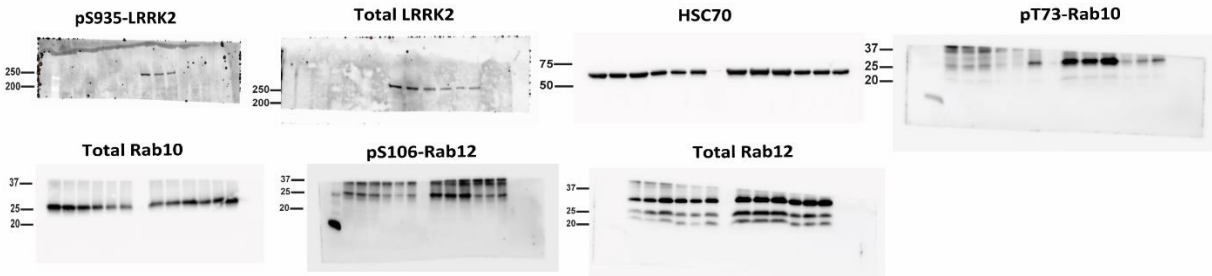

**Supplemental Figure 3.** Full uncropped immunoblots that correspond to the representative blots presented in main figures.
